# Supplementary material
Source: Springer Nature journal article supplement (https://www.springermedizin.de/resource/supplementary/13054_2012_1701_MOESM1_ESM.pdf/9711260)
Supplement: MOESM1 [file 9711260]

Patients with more than 72 hours of Mechanical Ventilation due to Acute Respiratory Failure

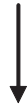

Demographic Data, Weaning Protocol.

Randomization

Extubation

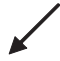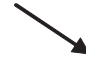

Noninvasive Ventilation immediately after extubation

Oxygen Mask  
5 L/min

IPAP= 8 cmH20 and EPAP= 4 cmH20

↑ EPAP if PaO<sub>2</sub> < 60 mmHg ou SpO<sub>2</sub>< 90%

↑ IPAP if PaCO<sub>2</sub> > 50 mmHg

↑ or ↓ IPAP according to RR/TV( L)

Monitoring after extubation:

- 15 minutes } Arterial blood gas analysis: PaO<sub>2</sub>, PaCO<sub>2</sub>
- 2 hours } Oxygen Saturation , Respiratory Rate
- 24 hours } Heart rate, Mean arterial Pressure
  
- 48 hours → Reintubation rate
- ICU length of stay
- Hospital Mortality
